# Supplementary material
Source: Springer Nature journal article supplement (https://www.springermedizin.de/resource/supplementary/13017_2012_257_MOESM3_ESM.pdf/9635766)
Supplement: MOESM3 [file 9635766]

Anamnesis + Basic Laboratory Tests

x

Data standardization:

$$(x-\mu)/\sigma$$

$\mu$  and  $\sigma$  from tabl. 1

Solve 3 equations:

Factor1, Factor2, Factor3

tabl. 4

Recovery prediction:

Factor1 > -1.4, Factor2 < 1.0, Factor3 < 0.4

tabl. 5 and fig. 2

Death prediction:

Factor1 < -1.4, Factor2 > 1.0, Factor3 > 0.4

tabl. 5 and fig. 2

If 2 or 3 Factors' scores  
indicate „Recovery” then

patient prediction is RECOVERY

If 2 or 3 Factors' scores  
indicate „death” then

patient prediction is DEATH
